# Supplementary material for: From where did the Western honeybee (Apis mellifera) originate?
Source: PubMed Central journal article supplement (PMC3433997; doi:10.1002/ece3.312), 2012-07-12

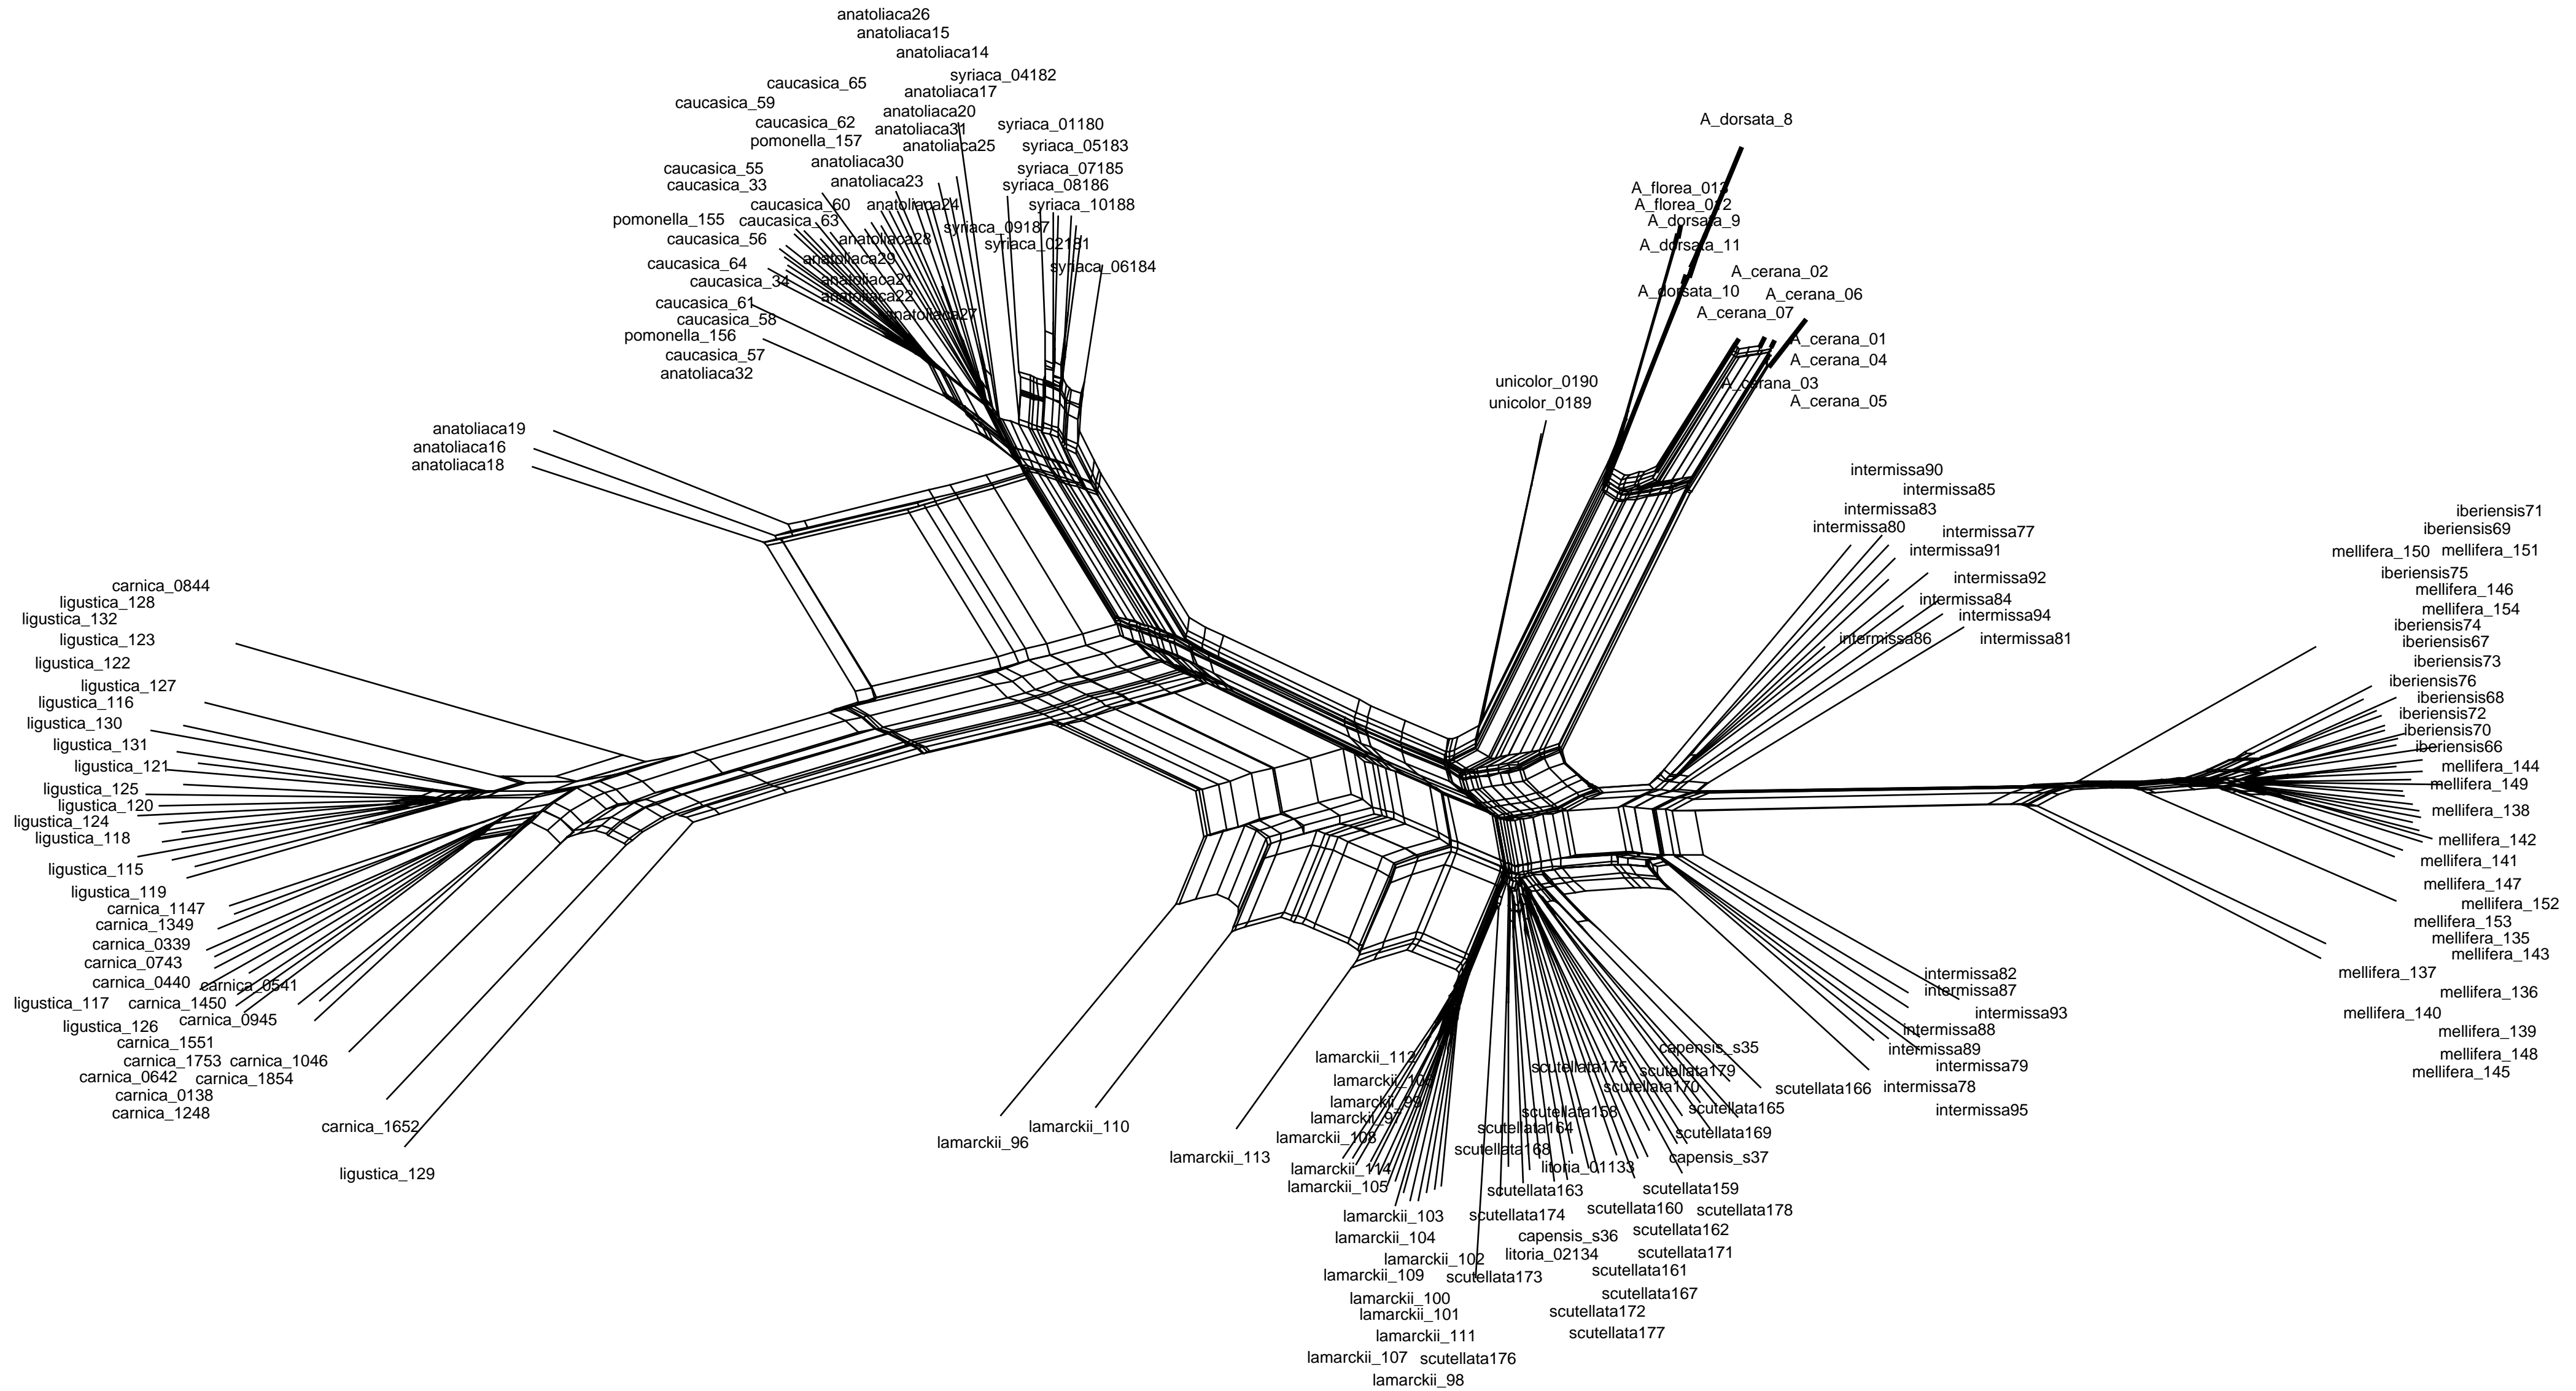

Supplement: ece30002-1949-SD1.pdf [file ece30002-1949-SD1.pdf]
